# Supplementary material for: Concurrent conductance and transition voltage spectroscopy study of scanning tunneling microscopy vacuum junctions. Does it unravel new physics?
Source: Royal Society of Chemistry journal article supplement (doi:10.1039/c4ra04648j), 2014-07-10
Supplement: c4ra04648j1.pdf [file c4ra04648j1.pdf]

# Electronic supplementary information for Concurrent conductance and transition voltage spectroscopy study of scanning tunneling microscopy vacuum junctions. Does it unravel new physics?

Ioan Bâldea \* a‡

## S1 Tunneling current

The tunneling electron current per unit area  $I$  along the  $z$ -direction across an energy barrier placed between two (STM-tip and substrate) electrodes under bias  $V$  ( $\mu_t - \mu_s = eV > 0$ ) having infinite transverse ( $x, y$ ) extension can be expressed as<sup>1,2</sup>

$$I_{\text{tunnel}} = K \left[ eV \int_{-E_F}^{\mu_s} \mathcal{T}(E_z; V) dE_z - \int_{\mu_s}^{\mu_t} E_z \mathcal{T}(E_z; V) dE_z \right]. \quad (\text{S1})$$

Once the barrier potential is known [eqn (1)], the transmission coefficient  $\mathcal{T}$  can be obtained exactly by numerically solving the Schrödinger equation.<sup>3</sup> The numerical factor entering eqn (5) can be easily obtained by using the value of the prefactor

$$K = 4\pi em\hbar^{-3} = 1.618 \times 10^8 \text{ pA nm}^{-2} \text{ eV}^{-2}, \quad (\text{S2})$$

where  $m$  and  $-e$  stand for electron mass and charge, respectively.

Although we have used eqn (S1) for all numerical results presented in the main text, we mention that results obtained by assuming a highly lateral constriction<sup>2,4</sup> (one-channel Landauer formula)

$$I_{\text{tunnel}} \propto \int_{\mu_s}^{\mu_t} \mathcal{T}(E_z; V) dE_z \quad (\text{S3})$$

are qualitatively similar and do not alter the conclusions of this work.

## S2 Effects relevant for a realistic barrier

Fig. S1 and Fig. S2 demonstrate that attempts to make the tunneling barrier more realistic do not improve the agreement between theory and experiment:  $V_t$  continues to increase roughly

<sup>a</sup> Theoretische Chemie, Universität Heidelberg, Im Neuenheimer Feld 229, D-69120 Heidelberg, Germany.

<sup>‡</sup> E-mail: ioan.baldea@pci.uni-heidelberg.de. Also at National Institute for Lasers, Plasmas, and Radiation Physics, Institute of Space Sciences, Bucharest, Romania

linear with  $1/d$ , and  $G$  exhibits an overall exponential decay with increasing  $d$ . To show that the potential profile has no substantial impact on  $V_t$ , we present in Fig. S1a results for two extreme situations. The linear potential drop of eqn (2) is one extreme idealization. The other extreme idealization would be a flat potential [ $z$ -independent  $V_b$  in eqn (1)]. Fig. S1b and Fig. S1c show that considering rather broad distributions of nanogap sizes and work functions rather than sharp  $d$  and  $\Phi$ 's do not improve the agreement with experiment.

## S3 Ghost transmission

Adding a small contribution  $\tau$  [given in the legend of Fig. S3] to the transmission by tunneling ( $\mathcal{T} \rightarrow \mathcal{T} + \tau$  in the RHS of eqn (S1)) — which could mimics an extra contribution due to pseudo-diffusion or hopping has an effect similar to the ghost current. This is visible by comparing Fig. S3 shown below with Fig. 3 of the main text.

## S4 The activation energy: an important issue for charge hopping

To make clear that fact that the large activation energies extracted from the experimental data<sup>7,8</sup> represent an important issue for assigning the charge transport in longer molecules as *entirely* due to hopping, we briefly expose the main difficulty, closely following ref. 7.

Within Marcus' electron transfer theory, the activation energy  $E_a$  that determines the Arrhenius temperature ( $T$ ) dependence of the conductance

$$G \propto \exp(-E_a/k_B T), \quad (\text{S4})$$

where  $k_B$  is Boltzmann's constant, can be expressed in terms of the thermodynamic driving force  $\Delta F$  and the reorganization energy  $\lambda$ <sup>7</sup>

$$E_a = \frac{(\lambda + \Delta F)^2}{4\lambda} \simeq \frac{\lambda}{4}. \quad (\text{S5})$$

The above approximation is justified by the smallness of the driving force  $\Delta F (\ll \lambda)$ ; typical values are a few tens of meV for  $\Delta F$  and a few tenths of eV for  $\lambda$ .  $\Delta F$  is basically given by the variation in hopping site energies related to the potential drop across the junction. For CP-AFM junctions, the above reorganization energy entering eqn (S5) comprises the contributions of intramolecular reorganization ( $\lambda_i$ ) and of environmental reorganization ( $\lambda_o$ )

$$\lambda = \lambda_o + \lambda_i \approx 2\lambda_i. \quad (\text{S6})$$

$\lambda_o$  embodies polarization effects of  $\sim 100$  molecules that form a CP-AFM junction. As done above, a common procedure is to assume

$$\lambda_o \approx \lambda_i \quad (\text{S7})$$

and to estimate the intramolecular reorganization  $\lambda_i$  by means of DFT calculations<sup>7</sup>. For the longer molecular species that exhibit thermally activated conduction, calculations at DFT/M062X/6-61G\*\* level yielded values  $\lambda_i = 0.30 - 0.10$  eV for the ONI series (cf. Table S4 of ref. 7) and  $\lambda_i = 0.41 - 0.17$  eV for the OPI series (cf. Table S6 of ref. 7). When using the B3LYP functional instead of M062X, values smaller by a factor of at least 2 were found (cf. Tables S5 and S7 of ref. 7). Even if the larger M062X-based  $\lambda_i$ -values are used, by comparing the activation energies deduced from eqn (S5) and (S6) with the experimental values ( $E_a \approx 0.54 - 0.62$  eV for ONI's<sup>7</sup> and  $E_a \approx 0.28$  eV for OPI's<sup>9</sup>) one has to conclude that the mismatch amounts to a factor of at least 2–3.

Although this is already quite important in view of the exponential dependence of eqn (S4) one should still note that the above  $\lambda_i$  should represent drastic overestimations: they embody the contributions of *all* intramolecular vibrations, while one should merely consider the contributions of very low frequency modes, which are the only ones can be thermally activated<sup>10</sup>.

## Notes and references

- 1 A. Sommerfeld and H. Bethe, *Handbuch der Physik*, Julius-Springer-Verlag, Berlin, 1933, vol. 24 (2), p. 446.
- 2 I. Báldea and H. Köppel, *Phys. Stat. Solidi (b)*, 2012, **249**, 1791–1804.
- 3 I. Báldea and H. Köppel, *Phys. Lett. A*, 2012, **376**, 1472–1476.
- 4 I. Báldea, *Europhys. Lett.*, 2012, **98**, 17010.
- 5 I. Báldea, *J. Phys. Chem. Solids*, 2012, **73**, 1151–1153.
- 6 I. Báldea, *Nanoscale*, 2013, **5**, 9222–9230.
- 7 S. H. Choi, C. Risko, M. C. R. Delgado, B. Kim, J.-L. Bredas and C. D. Frisbie, *J. Amer. Chem. Soc.*, 2010, **132**, 4358–4368.
- 8 T. Hines, I. Diez-Perez, J. Hihath, H. Liu, Z.-S. Wang, J. Zhao, G. Zhou, K. Müllen and N. Tao, *J. Am. Chem. Soc.*, 2010, **132**, 11658–11664.
- 9 S. H. Choi, B. Kim and C. D. Frisbie, *Science*, 2008, **320**, 1482–1486.
- 10 I. Báldea, *J. Phys. Chem. C*, 2014, **118**, 8676–8684.

No qualitative changes due to images or potential profile

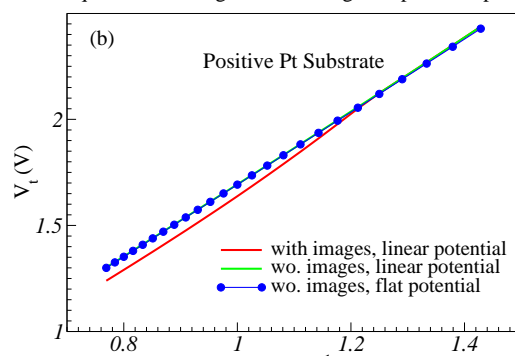

Negligible Impact of a Nanogap Size Distribution

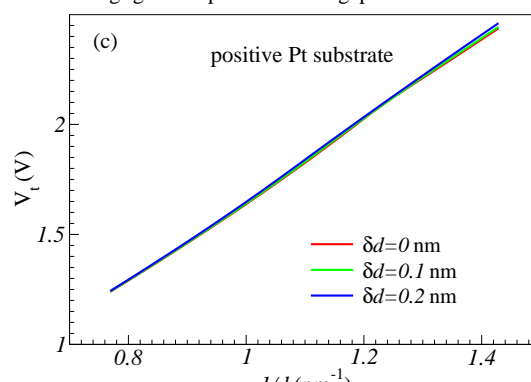

Negligible Impact of a Work Function Distribution

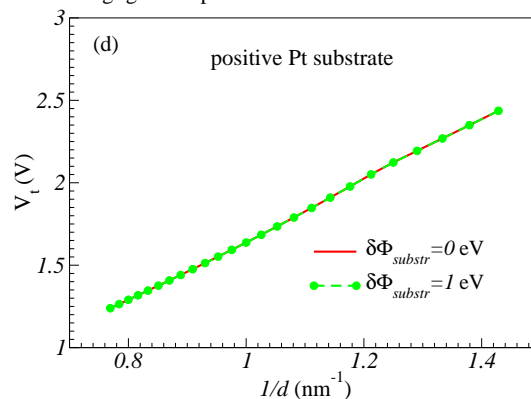

**Fig. S1** Transition voltage  $V_t$  as a function of the inverse nanogap size  $d$  for STM-tip of tungsten ( $\Phi_W = 4.55$  eV) and substrates of Pt ( $\Phi_{Pt} = 5.65$  eV) and Au ( $\Phi_{Au} = 5.2$  eV). Neither (a) ignoring image charges nor the potential profile, neither a uniform distribution of (b)  $d$  nor (c) of Pt-substrate work function  $W$  having finite widths denoted by  $\delta \dots$  and indicated in the legend qualitatively affects the approximate linear increase  $V_t \propto 1/d$ .

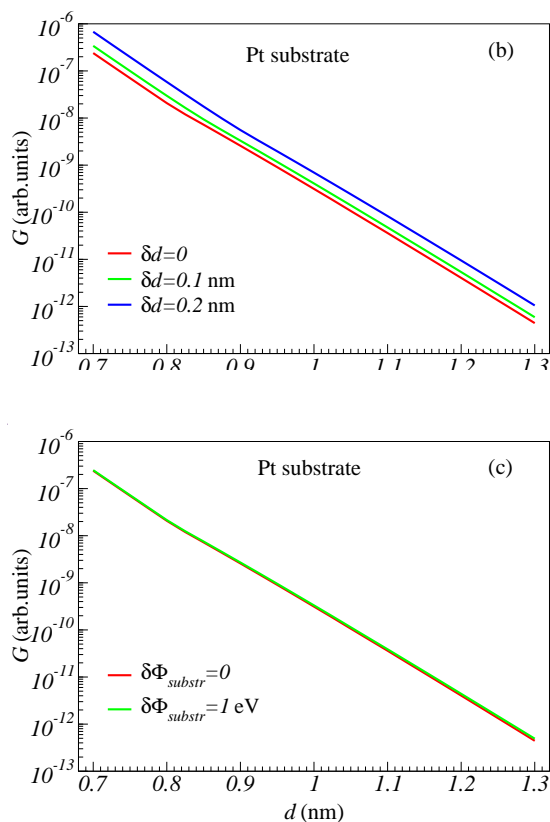

**Fig. S2** Ohmic conductance  $G$  as a function of the nanogap size  $d$  for STM-tip of tungsten ( $\Phi_W = 4.55$  eV) and substrates of Pt ( $\Phi_{Pt} = 5.65$  eV) and Au ( $\Phi_{Au} = 5.2$  eV). Neither a uniform distribution of (a)  $d$  nor (b) of Pt-substrate work function  $W$  having finite widths denoted by  $\delta \dots$  and indicated in the legend qualitatively affects the almost exponential decay.

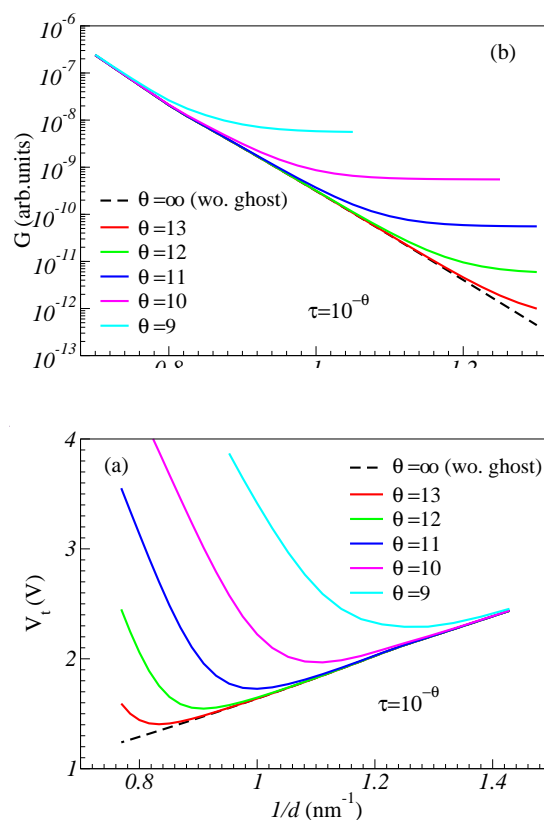

**Fig. S3** (a) Transition voltage  $V_t$  and (b) Ohmic conductance  $G$  as a function of the nanogap size  $d$  for STM-tip of tungsten ( $\Phi_W = 4.55$  eV) and substrates of Pt at positive biases ( $\Phi_{Pt} = 5.65$  eV) in the presence of a ghost channel of dimensionless resistivity  $\bar{\rho} = 10^V$ .  $v$ -values are given in the legend. Image charge effects are included using the exact classical interaction<sup>2,4,5</sup>, which is cutoff close to electrodes using the procedure described elsewhere<sup>6</sup>.
